# Supplementary material for: Health-related quality of life and tuberculosis: a longitudinal cohort study
Source: PubMed Central journal article supplement (PMC4443601; doi:10.1186/s12955-015-0250-4), 2015-05-27

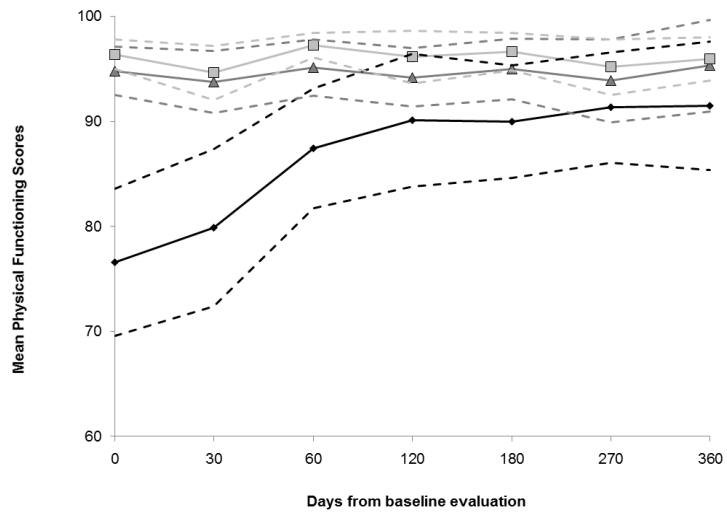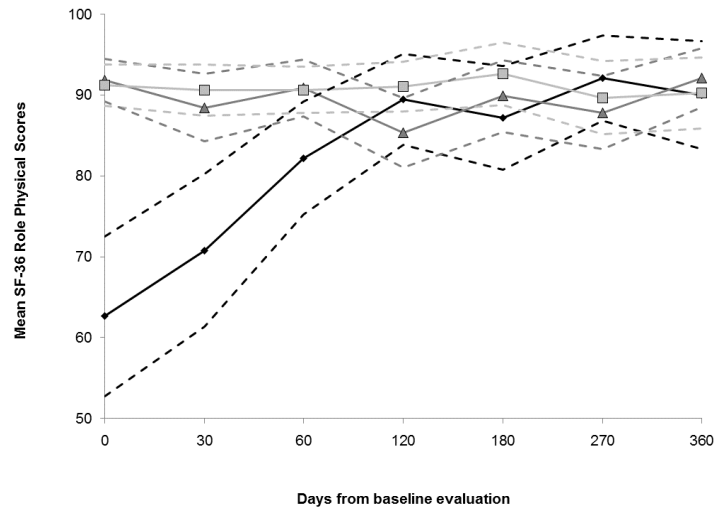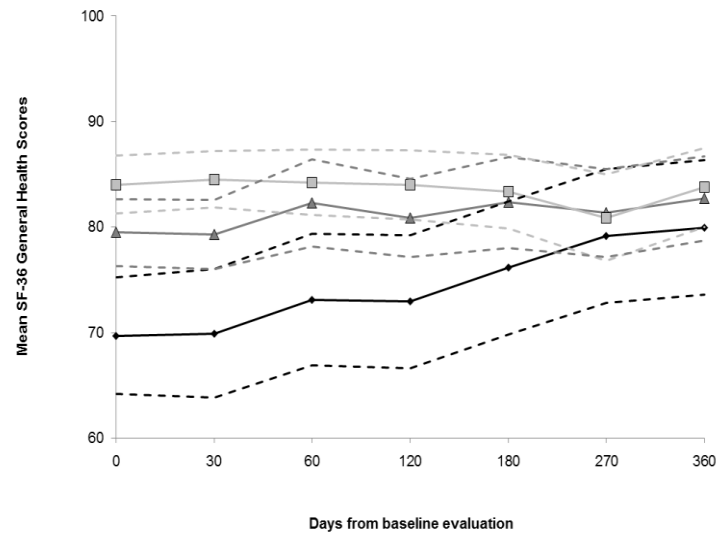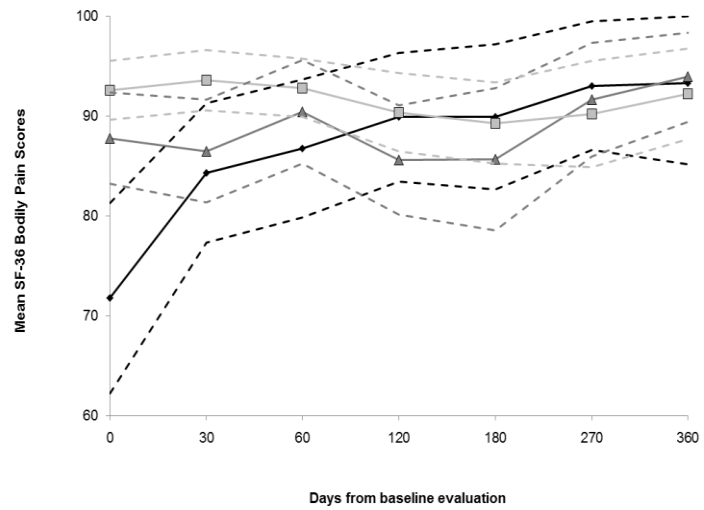

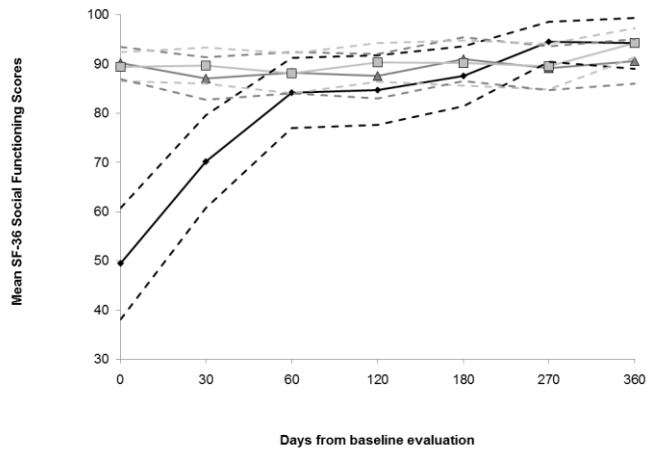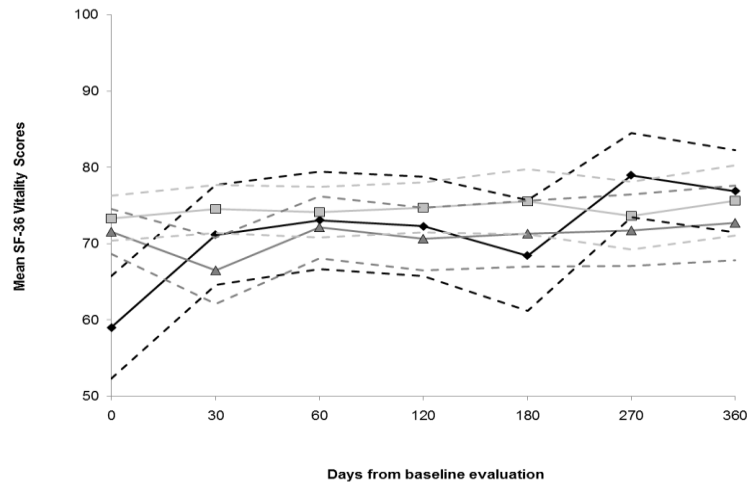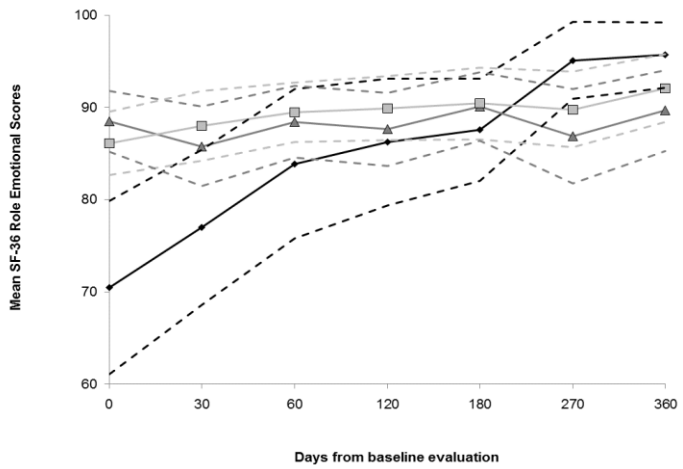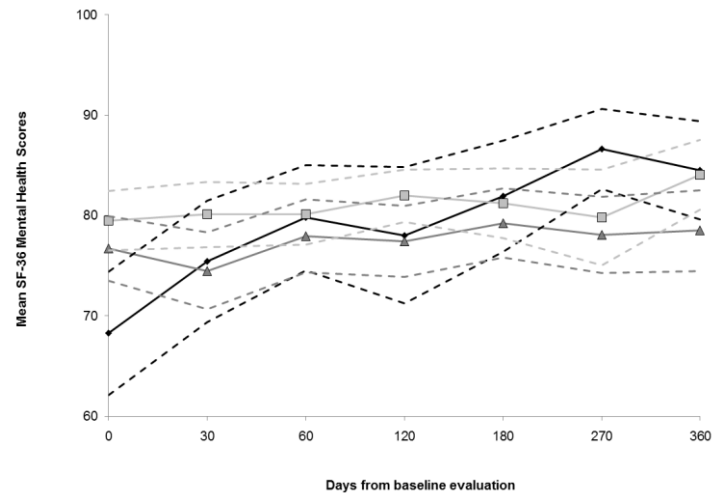

Supplement: 12955_2015_250_MOESM2_ESM.pdf [file 12955_2015_250_MOESM2_ESM.pdf]
