# Supplementary material for: Health-related quality of life and tuberculosis: a longitudinal cohort study
Source: Springer Nature journal article supplement (doi:10.1186/s12955-015-0250-4), 2015-05-26

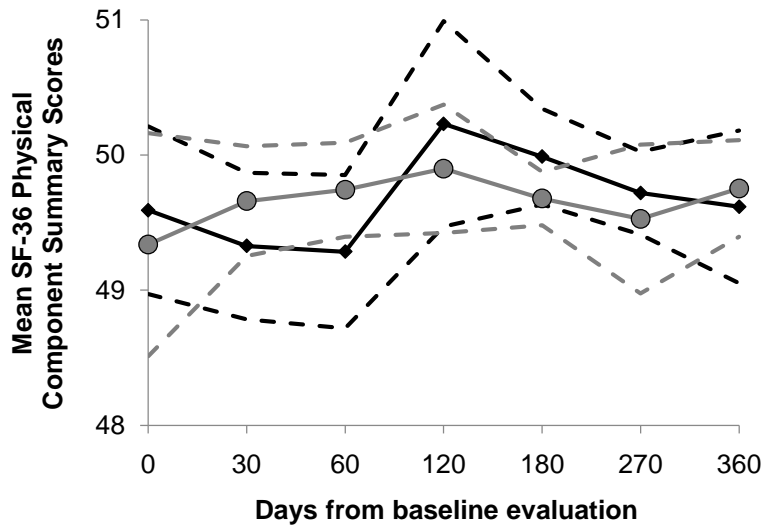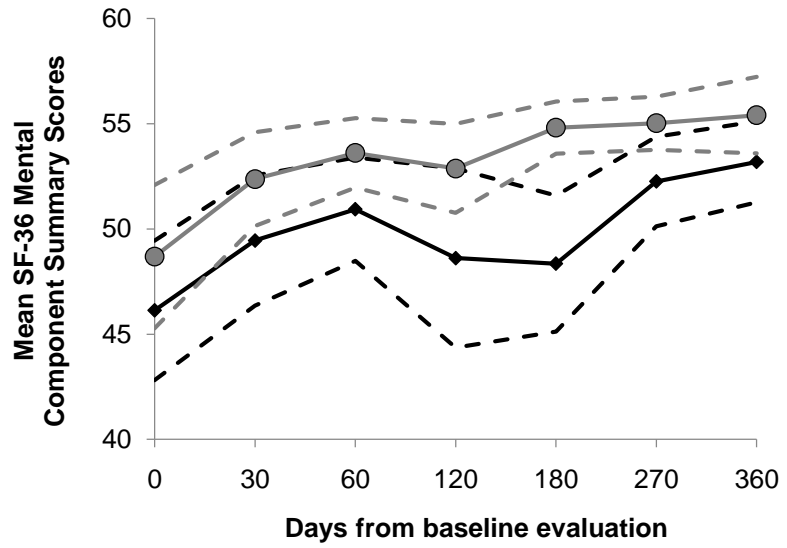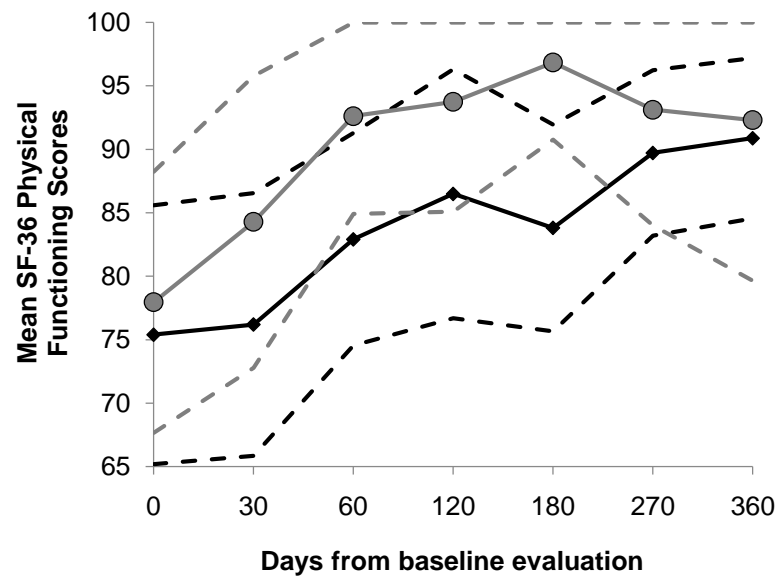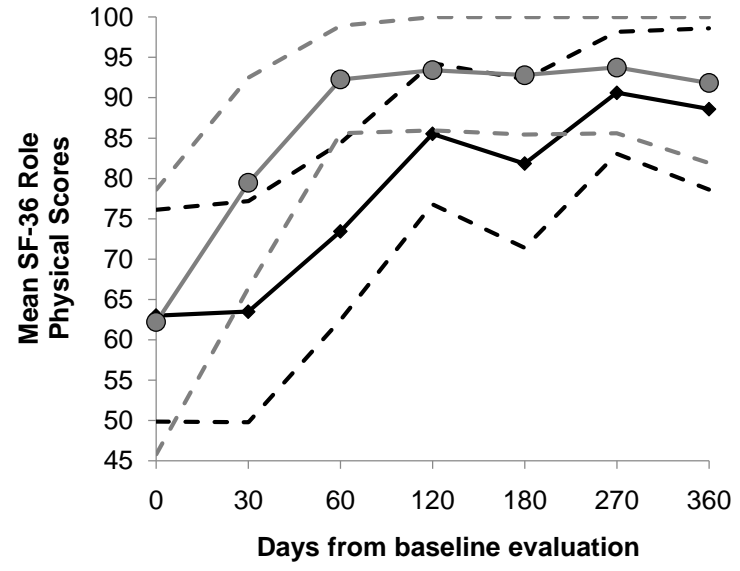

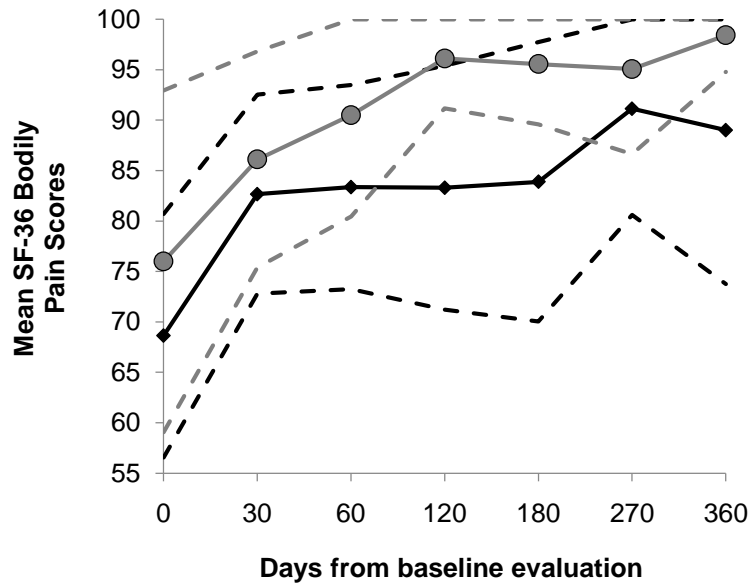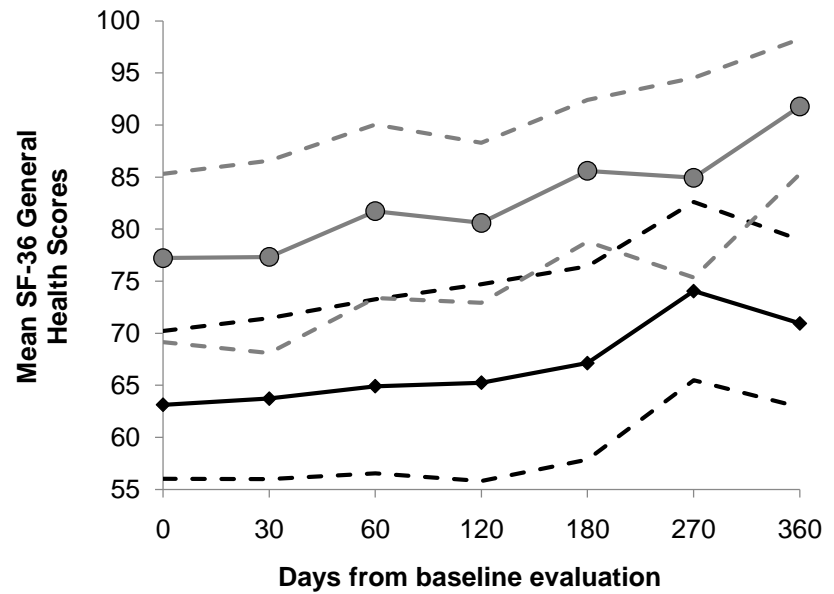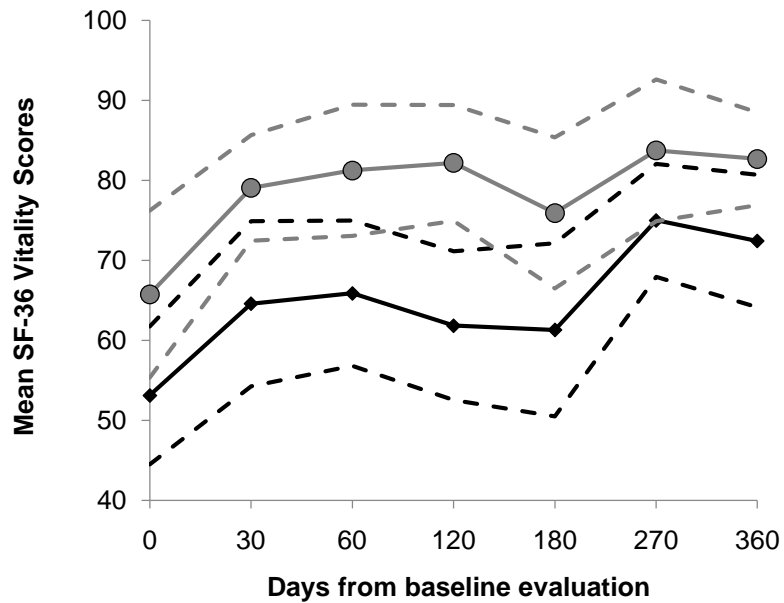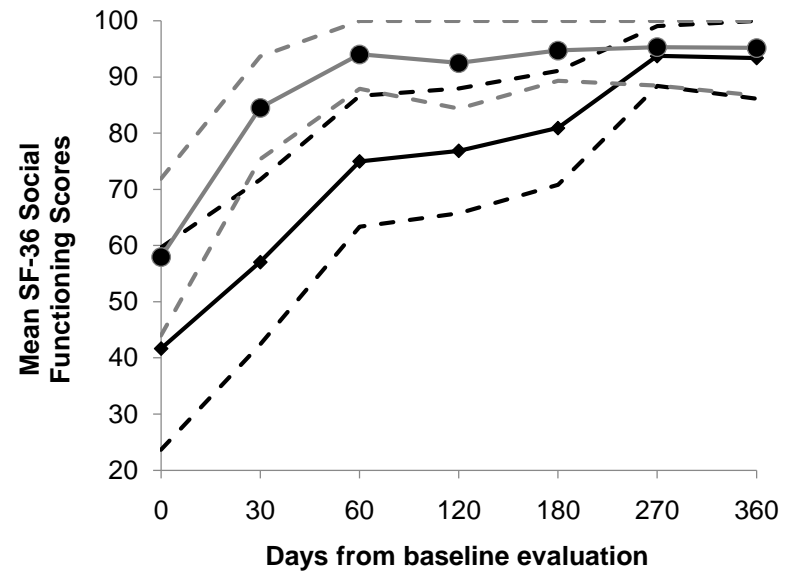

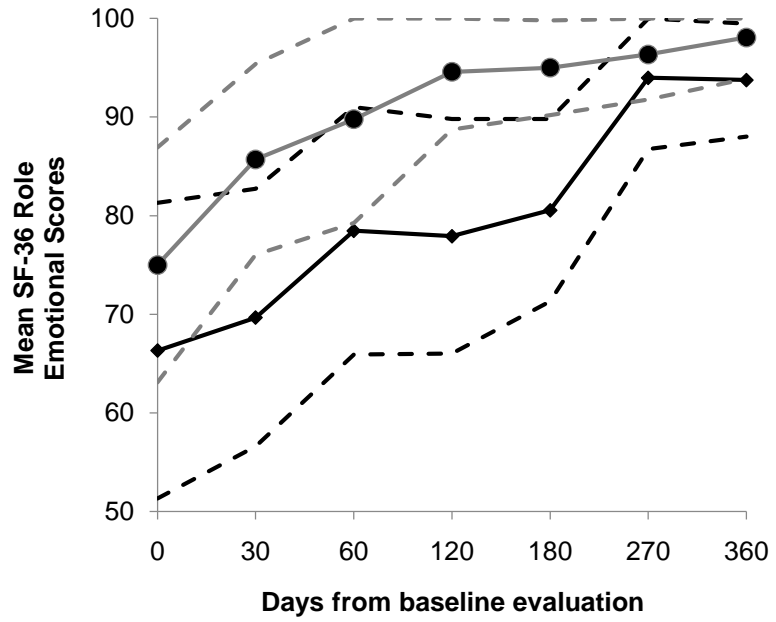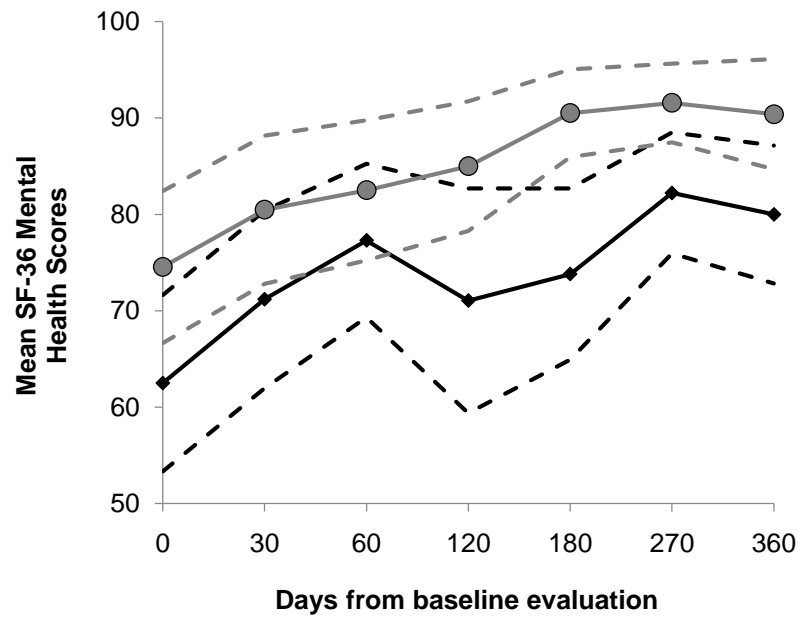

Supplement: MOESM3 [file 9764052]
